# Supplementary material for: Trends and Outcomes of Hypothermic Machine Perfusion Preservation of Kidney Allografts in Simultaneous Liver and Kidney Transplantation in the United States
Source: PubMed Central journal article supplement (PMC8958417; doi:10.3389/ti.2022.10345), 2022-03-14
Supplement: DataSheet1.pdf [file DataSheet1.pdf]

**Supplemental Table 1:** Mixed-effects multivariable model evaluating the recipient and donor predictors of MP preservation in SLK (N=5,988)

|                                     | Covariate-adjusted OR<br>(95% CI) | p-value |
|-------------------------------------|-----------------------------------|---------|
| Recipient female sex                | 1.20 (0.98-1.47)                  | 0.072   |
| Recipient age, per year             | 1.00 (0.99-1.01)                  | 0.590   |
| Recipient race/ethnicity            |                                   | 0.760   |
| White                               | Reference                         |         |
| Black                               | 0.86 (0.64-1.14)                  |         |
| Hispanic                            | 0.88 (0.66-1.19)                  |         |
| Asian                               | 0.82 (0.48-1.40)                  |         |
| Other                               | 1.04 (0.56-1.95)                  |         |
| Native MELD at LT, per point        | 1.01 (0.99-1.03)                  | 0.359   |
| Kidney disease severity             |                                   | 0.826   |
| On dialysis                         | Reference                         |         |
| eGFR <30mL/min/1.73m <sup>2</sup> * | 0.94 (0.75-1.17)                  |         |
| eGFR ≥30mL/min/1.73m <sup>2</sup> * | 1.02 (0.75-1.38)                  |         |
| Ascites                             |                                   | 0.503   |
| None                                | Reference                         |         |
| Mild                                | 0.84 (0.62-1.13)                  |         |
| Moderate-severe                     | 0.89 (0.65-1.20)                  |         |
| Encephalopathy                      |                                   | 0.290   |
| None                                | Reference                         |         |
| Grade 1-2                           | 1.18 (0.92-1.51)                  |         |
| Grade 3-4                           | 0.98 (0.68-1.41)                  |         |
| Recipient location                  |                                   | 0.961   |
| Home                                | Reference                         |         |
| Inpatient                           | 1.00 (0.76-1.31)                  |         |
| ICU                                 | 1.04 (0.75-1.45)                  |         |
| Recipient diabetes                  | 1.02 (0.81-1.29)                  | 0.867   |
| Recipient kidney disease            |                                   | 0.525   |
| Glomerular disease                  | Reference                         |         |
| Diabetes                            | 1.02 (0.66-1.56)                  |         |
| Hypertension                        | 0.92 (0.55-1.51)                  |         |
| Polycystic kidney disease           | 1.22 (0.73-2.04)                  |         |
| Hepatorenal syndrome                | 0.83 (0.56-1.22)                  |         |
| Other                               | 0.94 (0.63-1.40)                  |         |
| Donor age, per year                 | 1.02 (1.01-1.03)                  | <0.001  |
| Female donor sex                    | 0.99 (0.81-1.21)                  | 0.911   |
| Donor race/ethnicity                |                                   | 0.249   |
| White                               | Reference                         |         |
| Black                               | 1.16 (0.89-1.53)                  |         |
| Hispanic                            | 1.21 (0.91-1.63)                  |         |
| Asian/other                         | 0.74 (0.43-1.28)                  |         |
| Donor hypertension                  | 1.04 (0.81-1.34)                  | 0.753   |
| Donor diabetes                      | 1.47 (0.96-2.24)                  | 0.073   |
| DCD donor                           | 2.81 (1.88-4.20)                  | <0.001  |
| Kidney graft CIT, per hour          | 1.10 (1.08-1.11)                  | <0.001  |

|                                       |                  |        |
|---------------------------------------|------------------|--------|
| Split liver                           | 0.74 (0.32-1.74) | 0.488  |
| Share type                            |                  | <0.001 |
| Local                                 | Reference        |        |
| Regional                              | 0.47 (0.36-0.61) |        |
| National                              | 0.67 (0.40-1.13) |        |
| Donor HCV Ab positive                 | 1.12 (0.77-1.63) | 0.555  |
| Donor terminal creatinine, per 1mg/dL | 1.22 (1.08-1.39) | 0.001  |
| Donor BMI, per kg/m <sup>2</sup>      | 1.02 (1.00-1.04) | 0.020  |
| Donor cause of death                  |                  | 0.359  |
| Anoxia                                | Reference        |        |
| CVA                                   | 0.77 (0.58-1.01) |        |
| Head trauma                           | 0.98 (0.77-1.24) |        |
| CNS tumor                             | 0.64 (0.19-2.18) |        |
| Other                                 | 0.83 (0.45-1.52) |        |
| Transplant era                        |                  | <0.001 |
| 2005-2009                             | Reference        |        |
| 2010-2014                             | 2.42 (1.72-3.39) |        |
| 2015-2020                             | 6.03 (4.30-8.44) |        |

**Supplemental Table 2:** Mixed-effects multivariable logistic regression model evaluating kidney allograft preservation strategy as a predictor of delayed graft function (N=5,986)

|                                      | Covariate-adjusted OR for DGF (95% CI) | p-value      |
|--------------------------------------|----------------------------------------|--------------|
| <b>Kidney allograft preservation</b> |                                        | <b>0.008</b> |
| <b>Cold storage</b>                  | <b>Reference</b>                       |              |
| <b>Machine perfusion</b>             | <b>0.74 (0.60-0.92)</b>                |              |
| Recipient female sex                 | 1.10 (0.96-1.27)                       | 0.180        |
| Recipient age, per year              | 1.00 (0.99-1.00)                       | 0.423        |
| Recipient race/ethnicity             |                                        | 0.091        |
| White                                | Reference                              |              |
| Black                                | 1.22 (0.99-1.51)                       |              |
| Hispanic                             | 0.95 (0.78-1.16)                       |              |
| Asian                                | 1.41 (1.00-1.99)                       |              |
| Other                                | 1.01 (0.61-1.68)                       |              |
| Native MELD at LT, per point         | 1.03 (1.02-1.05)                       | <0.001       |
| Kidney disease severity              |                                        | <0.001       |
| On dialysis                          | Reference                              |              |
| eGFR <30mL/min/1.73m <sup>2</sup> *  | 0.39 (0.33-0.47)                       |              |
| eGFR ≥30mL/min/1.73m <sup>2</sup> *  | 0.31 (0.24-0.39)                       |              |
| Ascites                              |                                        | 0.007        |
| None                                 | Reference                              |              |
| Mild                                 | 0.81 (0.65-1.01)                       |              |
| Moderate-severe                      | 0.70 (0.56-0.88)                       |              |
| Encephalopathy                       |                                        | 0.565        |
| None                                 | Reference                              |              |
| Grade 1-2                            | 1.10 (0.92-1.32)                       |              |
| Grade 3-4                            | 1.09 (0.84-1.41)                       |              |
| Recipient location                   |                                        | 0.001        |
| Home                                 | Reference                              |              |
| Inpatient                            | 0.92 (0.75-1.12)                       |              |
| ICU                                  | 1.36 (1.09-1.70)                       |              |
| Recipient diabetes                   | 0.94 (0.80-1.11)                       | 0.487        |
| Recipient kidney disease             |                                        | 0.229        |
| Glomerular disease                   | Reference                              |              |
| Diabetes                             | 1.27 (0.92-1.74)                       |              |
| Hypertension                         | 1.17 (0.82-1.67)                       |              |
| Polycystic kidney disease            | 0.79 (0.52-1.20)                       |              |
| Hepatorenal syndrome                 | 1.08 (0.81-1.46)                       |              |
| Other                                | 1.05 (0.78-1.41)                       |              |
| Donor age, per year                  | 1.01 (1.01-1.02)                       | <0.001       |
| Female donor sex                     | 1.04 (0.90-1.22)                       | 0.601        |
| Donor race/ethnicity                 |                                        | 0.447        |
| White                                | Reference                              |              |
| Black                                | 0.91 (0.74-1.11)                       |              |
| Hispanic                             | 0.95 (0.78-1.16)                       |              |
| Asian/other                          | 0.77 (0.55-1.20)                       |              |
| Donor hypertension                   | 1.35 (1.13-1.61)                       | 0.001        |
| Donor diabetes                       | 1.39 (1.03-1.89)                       | 0.032        |

|                                       |                  |        |
|---------------------------------------|------------------|--------|
| DCD donor                             | 2.64 (1.98-3.52) | <0.001 |
| Kidney graft CIT, per hour            | 1.02 (1.01-1.03) | <0.001 |
| Split liver                           | 0.65 (0.33-1.28) | 0.211  |
| Share type                            |                  | 0.020  |
| Local                                 | Reference        |        |
| Regional                              | 1.20 (1.01-1.42) |        |
| National                              | 1.55 (1.03-2.36) |        |
| Donor HCV Ab positive                 | 0.92 (0.69-1.22) | 0.513  |
| Donor terminal creatinine, per 1mg/dL | 1.28 (1.17-1.40) | <0.001 |
| Donor BMI, per kg/m <sup>2</sup>      | 1.02 (1.01-1.03) | 0.001  |
| Donor cause of death                  |                  | 0.077  |
| Anoxia                                | Reference        |        |
| CVA                                   | 1.22 (1.00-1.48) |        |
| Head trauma                           | 0.92 (0.77-1.10) |        |
| CNS tumor                             | 0.75 (0.27-2.12) |        |
| Other                                 | 1.01 (0.65-1.57) |        |
| Transplant era                        |                  | <0.001 |
| 2005-2009                             | Reference        |        |
| 2010-2014                             | 1.59 (1.28-1.99) |        |
| 2015-2020                             | 1.96 (1.56-2.46) |        |

**Supplemental Table 3:** Multivariable logistic regression model evaluating center MP use as a predictor of delayed graft function (N=5,986)

|                                        | Covariate-adjusted OR for DGF (95% CI) | p-value          |
|----------------------------------------|----------------------------------------|------------------|
| <b>Center MP use, per 10% increase</b> | <b>0.93 (0.90-0.96)</b>                | <b>&lt;0.001</b> |
| Recipient female sex                   | 1.07 (0.94-1.23)                       | 0.299            |
| Recipient age, per year                | 1.00 (0.99-1.00)                       | 0.483            |
| Recipient race/ethnicity               |                                        | 0.006            |
| White                                  | Reference                              |                  |
| Black                                  | 1.19 (0.98-1.45)                       |                  |
| Hispanic                               | 1.17 (0.99-1.39)                       |                  |
| Asian                                  | 1.75 (1.26-1.39)                       |                  |
| Other                                  | 1.16 (0.72-1.88)                       |                  |
| Native MELD at LT, per point           | 1.03 (1.02-1.05)                       | <0.001           |
| Kidney disease severity                |                                        | <0.001           |
| On dialysis                            | Reference                              |                  |
| eGFR <30mL/min/1.73m <sup>2</sup> *    | 0.36 (0.30-0.42)                       |                  |
| eGFR ≥30mL/min/1.73m <sup>2</sup> *    | 0.32 (0.25-0.40)                       |                  |
| Ascites                                |                                        | 0.004            |
| None                                   | Reference                              |                  |
| Mild                                   | 0.79 (0.64-0.96)                       |                  |
| Moderate-severe                        | 0.70 (0.57-0.86)                       |                  |
| Encephalopathy                         |                                        | 0.409            |
| None                                   | Reference                              |                  |
| Grade 1-2                              | 1.05 (0.89-1.23)                       |                  |
| Grade 3-4                              | 0.92 (0.73-1.16)                       |                  |
| Recipient location                     |                                        | <0.001           |
| Home                                   | Reference                              |                  |
| Inpatient                              | 0.99 (0.82-.1.19)                      |                  |
| ICU                                    | 1.72 (1.40-2.10)                       |                  |
| Recipient diabetes                     | 0.98 (0.84-1.15)                       | 0.839            |
| Recipient kidney disease               |                                        | 0.446            |
| Glomerular disease                     | Reference                              |                  |
| Diabetes                               | 1.13 (0.84-1.53)                       |                  |
| Hypertension                           | 1.00 (0.71-1.41)                       |                  |
| Polycystic kidney disease              | 0.85 (0.58-1.26)                       |                  |
| Hepatorenal syndrome                   | 1.12 (0.85-1.49)                       |                  |
| Other                                  | 0.97 (0.74-1.29)                       |                  |
| Donor age, per year                    | 1.01 (1.01-1.02)                       | <0.001           |
| Female donor sex                       | 1.00 (0.87-1.15)                       | 0.981            |
| Donor race/ethnicity                   |                                        | 0.289            |
| White                                  | Reference                              |                  |
| Black                                  | 0.88 (0.73-1.07)                       |                  |
| Hispanic                               | 1.11 (0.93-1.33)                       |                  |
| Asian/other                            | 0.97 (0.70-1.34)                       |                  |
| Donor hypertension                     | 1.25 (1.05-1.48)                       | 0.011            |
| Donor diabetes                         | 1.41 (1.06-1.89)                       | 0.018            |
| DCD donor                              | 2.70 (2.07 (3.51)                      | <0.001           |
| Kidney graft CIT, per hour             | 1.02 (1.01-1.03)                       | <0.001           |

|                                       |                  |        |
|---------------------------------------|------------------|--------|
| Split liver                           | 0.80 (0.42-1.54) | 0.505  |
| Share type                            |                  | 0.001  |
| Local                                 | Reference        |        |
| Regional                              | 1.24 (1.06-1.45) |        |
| National                              | 1.84 (1.25-2.71) |        |
| Donor HCV Ab positive                 | 0.91 (0.70-1.19) | 0.514  |
| Donor terminal creatinine, per 1mg/dL | 1.27 (1.16-1.38) | <0.001 |
| Donor BMI, per kg/m <sup>2</sup>      | 1.02 (1.01-1.03) | 0.001  |
| Donor cause of death                  |                  | 0.057  |
| Anoxia                                | Reference        |        |
| CVA                                   | 1.21 (1.01-1.45) |        |
| Head trauma                           | 0.91 (0.78-1.08) |        |
| CNS tumor                             | 0.81 (0.30-2.16) |        |
| Other                                 | 0.98 (0.64-1.49) |        |
| Transplant era                        |                  | <0.001 |
| 2005-2009                             | Reference        |        |
| 2010-2014                             | 1.40 (1.14-1.72) |        |
| 2015-2020                             | 1.63 (1.32-2.01) |        |

**Supplemental Table 4:** Mixed effects multivariable logistic regression model evaluating kidney allograft preservation strategy as a predictor of primary non-function (N=5,776)

|                                      | Covariate-adjusted OR for PNF (95% CI) | p-value      |
|--------------------------------------|----------------------------------------|--------------|
| <b>Kidney allograft preservation</b> |                                        | <b>0.637</b> |
| <b>Cold storage</b>                  | <b>Reference</b>                       |              |
| <b>Machine perfusion</b>             | <b>0.88 (0.52-1.49)</b>                |              |
| Kidney disease severity              |                                        | 0.002        |
| On dialysis                          | Reference                              |              |
| eGFR <30mL/min/1.73m <sup>2</sup> *  | 0.67 (0.42-1.05)                       |              |
| eGFR ≥30mL/min/1.73m <sup>2</sup> *  | 0.18 (0.07-0.50)                       |              |
| Recipient location                   |                                        | 0.011        |
| Home                                 | Reference                              |              |
| Inpatient                            | 0.79 (0.48-1.30)                       |              |
| ICU                                  | 1.72 (1.11-2.66)                       |              |
| Donor age, per year                  | 1.03 (1.01-1.04)                       | <0.001       |
| Donor BMI, per kg/m <sup>2</sup>     | 1.05 (1.02-1.08)                       | 0.002        |
| Donor cause of death                 |                                        | 0.021        |
| Anoxia                               | Reference                              |              |
| CVA                                  | 2.01 (1.19-3.40)                       |              |
| Head trauma                          | 1.48 (0.87-2.52)                       |              |
| CNS tumor                            | 6.06 (1.66-22.08)                      |              |
| Other                                | 1.66 (0.49-5.69)                       |              |

**Supplemental Table 5:** Multivariable logistic regression model evaluating center MP use as a predictor of delayed graft function (N=5,986)

|                                        | Covariate-adjusted OR for DGF (95% CI) | p-value      |
|----------------------------------------|----------------------------------------|--------------|
| <b>Center MP use, per 10% increase</b> | <b>0.94 (0.85-1.04)</b>                | <b>0.233</b> |
| Kidney disease severity                |                                        | 0.002        |
| On dialysis                            | Reference                              |              |
| eGFR <30mL/min/1.73m <sup>2</sup> *    | 0.67 (0.43-1.05)                       |              |
| eGFR ≥30mL/min/1.73m <sup>2</sup> *    | 0.18 (0.07-0.50)                       |              |
| Recipient location                     |                                        | 0.012        |
| Home                                   | Reference                              |              |
| Inpatient                              | 0.79 (0.48-1.30)                       |              |
| ICU                                    | 1.72 (1.11-2.66)                       |              |
| Donor age, per year                    | 1.03 (1.01-1.04)                       | <0.001       |
| Donor BMI, per kg/m <sup>2</sup>       | 1.05 (1.02-1.08)                       | 0.002        |
| Donor cause of death                   |                                        | 0.021        |
| Anoxia                                 | Reference                              |              |
| CVA                                    | 2.01 (1.19-3.39)                       |              |
| Head trauma                            | 1.48 (0.87-2.52)                       |              |
| CNS tumor                              | 6.11 (1.68-22.2)                       |              |
| Other                                  | 1.65 (0.48-5.64)                       |              |

Note: Likelihood ratio test for mixed-effects versus standard logistic regression p=0.074



**Supplemental Table 6:** Multivariable Cox proportional hazards model evaluating kidney allograft preservation strategy as a predictor of kidney graft survival (N=5,928)

|                                      | Covariate-adjusted HR for graft survival (95% CI) | p-value      |
|--------------------------------------|---------------------------------------------------|--------------|
| <b>Kidney allograft preservation</b> |                                                   | <b>0.230</b> |
| <b>Cold storage</b>                  | <b>Reference</b>                                  |              |
| <b>Machine perfusion</b>             | <b>0.91 (0.78-1.06)</b>                           |              |
| Recipient female sex                 | 0.93 (0.83-1.03)                                  | 0.167        |
| Recipient age, per year              | 1.01 (1.00-1.02)                                  | <0.001       |
| Recipient race/ethnicity             |                                                   | 0.001        |
| White                                | Reference                                         |              |
| Black                                | 1.19 (1.03-1.37)                                  |              |
| Hispanic                             | 0.83 (0.72-0.96)                                  |              |
| Asian                                | 1.01 (0.78-1.31)                                  |              |
| Other                                | 0.55 (0.33-0.93)                                  |              |
| Native MELD at LT, per point         | 1.00 (0.99-1.01)                                  | 0.549        |
| Kidney disease severity              |                                                   | 0.003        |
| On dialysis                          | Reference                                         |              |
| eGFR <30mL/min/1.73m <sup>2</sup> *  | 0.84 (0.75-0.95)                                  |              |
| eGFR ≥30mL/min/1.73m <sup>2</sup> *  | 0.81 (0.69-0.96)                                  |              |
| Ascites                              |                                                   | 0.208        |
| None                                 | Reference                                         |              |
| Mild                                 | 0.98 (0.84-1.17)                                  |              |
| Moderate-severe                      | 0.90 (0.76-1.06)                                  |              |
| Encephalopathy                       |                                                   | 0.136        |
| None                                 | Reference                                         |              |
| Grade 1-2                            | 1.03 (0.90-1.17)                                  |              |
| Grade 3-4                            | 1.19 (0.99-1.43)                                  |              |
| Recipient location                   |                                                   | 0.012        |
| Home                                 | Reference                                         |              |
| Inpatient                            | 1.08 (0.94-1.25)                                  |              |
| ICU                                  | 1.28 (1.09-1.51)                                  |              |
| Recipient diabetes                   | 1.23 (1.09-1.51)                                  | 0.001        |
| Recipient kidney disease             |                                                   | 0.001        |
| Glomerular disease                   | Reference                                         |              |
| Diabetes                             | 1.17 (0.94-1.45)                                  |              |
| Hypertension                         | 1.20 (0.94-1.52)                                  |              |
| Polycystic kidney disease            | 0.63 (0.44-0.88)                                  |              |
| Hepatorenal syndrome                 | 0.95 (0.76-1.19)                                  |              |
| Other                                | 1.10 (0.90-1.35)                                  |              |
| Donor age, per year                  | 1.01 (1.01-1.02)                                  | <0.001       |
| Female donor sex                     | 1.03 (0.92-1.14)                                  | 0.620        |
| Donor race/ethnicity                 |                                                   | 0.073        |
| White                                | Reference                                         |              |
| Black                                | 1.19 (1.04-1.37)                                  |              |
| Hispanic                             | 1.09 (0.94-1.26)                                  |              |
| Asian/other                          | 1.13 (0.87-1.46)                                  |              |
| Donor hypertension                   | 1.17 (1.03-1.33)                                  | 0.017        |
| Donor diabetes                       | 1.05 (0.84-1.33)                                  | 0.660        |

|                                       |                  |        |
|---------------------------------------|------------------|--------|
| DCD donor                             | 1.51 (1.21-1.88) | <0.001 |
| Kidney graft CIT, per hour            | 1.01 (1.00-1.01) | 0.069  |
| Split liver                           | 1.18 (0.74-1.87) | 0.489  |
| Share type                            |                  | 0.011  |
| Local                                 | Reference        |        |
| Regional                              | 1.19 (1.04-1.35) |        |
| National                              | 1.38 (0.98-1.94) |        |
| Donor HCV Ab positive                 | 0.93 (0.74-1.17) | 0.517  |
| Donor terminal creatinine, per 1mg/dL | 1.03 (0.97-1.09) | 0.307  |
| Donor BMI, per kg/m <sup>2</sup>      | 1.00 (0.99-1.01) | 0.422  |
| Donor cause of death                  |                  | 0.446  |
| Anoxia                                | Reference        |        |
| CVA                                   | 1.02 (0.88-1.18) |        |
| Head trauma                           | 0.96 (0.84-1.10) |        |
| CNS tumor                             | 1.28 (0.76-2.17) |        |
| Other                                 | 0.76 (0.53-1.10) |        |
| Transplant era                        |                  | <0.001 |
| 2005-2009                             | Reference        |        |
| 2010-2014                             | 0.79 (0.70-0.90) |        |
| 2015-2020                             | 0.75 (0.64-0.89) |        |

**Supplemental Table 7:** Multivariable Cox proportional hazards model evaluating kidney allograft preservation strategy as a predictor of kidney graft survival inclusive of the interaction with KDPI category (N=5,928)

|                                                  | Covariate-adjusted HR for graft survival (95% CI) | p-value          |
|--------------------------------------------------|---------------------------------------------------|------------------|
| <b>Kidney allograft preservation</b>             |                                                   | <b>0.014</b>     |
| <b>Cold storage</b>                              | <b>Reference</b>                                  |                  |
| <b>Machine perfusion (at KDPI &lt;20%)</b>       | <b>0.67 (0.49-0.92)</b>                           |                  |
| <b>KDPI category (cold storage preservation)</b> |                                                   | <b>&lt;0.001</b> |
| <20%                                             | <b>Reference</b>                                  |                  |
| 20-34%                                           | <b>1.03 (0.88-1.21)</b>                           |                  |
| 35-85%                                           | <b>1.45 (1.28-1.65)</b>                           |                  |
| >85%                                             | <b>1.90 (1.49-2.42)</b>                           |                  |
| <b>Allograft preservation * KDPI category</b>    |                                                   | <b>0.029</b>     |
| <b>Machine perfusion * KDPI &lt;20%</b>          | <b>Reference</b>                                  |                  |
| <b>Machine perfusion * KDPI 20-34%</b>           | <b>1.35 (0.86-2.13)</b>                           |                  |
| <b>Machine perfusion * KDPI 35-85%</b>           | <b>1.59 (1.10-2.29)</b>                           |                  |
| <b>Machine perfusion * KDPI &gt;85%</b>          | <b>2.11 (1.21-3.67)</b>                           |                  |
| Recipient female sex                             | 0.91 (0.82-1.01)                                  | 0.088            |
| Recipient age, per year                          | 1.01 (1.01-1.02)                                  | <0.001           |
| Recipient race/ethnicity                         |                                                   | 0.001            |
| White                                            | <b>Reference</b>                                  |                  |
| Black                                            | 1.16 (1.01-1.34)                                  |                  |
| Hispanic                                         | 0.83 (0.72-0.96)                                  |                  |
| Asian                                            | 1.01 (0.79-1.31)                                  |                  |
| Other                                            | 0.54 (0.33-0.91)                                  |                  |
| Native MELD at LT, per point                     | 1.00 (0.99-1.01)                                  | 0.666            |
| Kidney disease severity                          |                                                   | 0.003            |
| On dialysis                                      | <b>Reference</b>                                  |                  |
| eGFR <30mL/min/1.73m <sup>2</sup> *              | 0.84 (0.75-0.95)                                  |                  |
| eGFR ≥30mL/min/1.73m <sup>2</sup> *              | 0.81 (0.69-0.95)                                  |                  |
| Ascites                                          |                                                   | 0.322            |
| None                                             | <b>Reference</b>                                  |                  |
| Mild                                             | 0.99 (0.84-1.16)                                  |                  |
| Moderate-severe                                  | 0.91 (0.77-1.08)                                  |                  |
| Encephalopathy                                   |                                                   | 0.276            |
| None                                             | <b>Reference</b>                                  |                  |
| Grade 1-2                                        | 1.03 (0.91-1.17)                                  |                  |
| Grade 3-4                                        | 1.15 (0.96-1.38)                                  |                  |
| Recipient location                               |                                                   | 0.011            |
| Home                                             | <b>Reference</b>                                  |                  |
| Inpatient                                        | 1.08 (0.94-1.24)                                  |                  |
| ICU                                              | 1.28 (1.09-1.51)                                  |                  |
| Recipient diabetes                               | 1.23 (1.09-1.38)                                  | 0.001            |
| Recipient kidney disease                         |                                                   | 0.002            |
| Glomerular disease                               | <b>Reference</b>                                  |                  |
| Diabetes                                         | 1.17 (0.94-1.45)                                  |                  |
| Hypertension                                     | 1.19 (0.93-1.50)                                  |                  |
| Polycystic kidney disease                        | 0.63 (0.45-0.89)                                  |                  |

|                            |                  |        |
|----------------------------|------------------|--------|
| Hepatorenal syndrome       | 0.96 (0.77-1.20) |        |
| Other                      | 1.11 (0.91-1.35) |        |
| Female donor sex           | 1.00 (0.90-1.11) | 0.999  |
| Kidney graft CIT, per hour | 1.01 (1.00-1.01) | 0.043  |
| Split liver                | 1.10 (0.69-1.35) | 0.692  |
| Share type                 |                  | 0.019  |
| Local                      | Reference        |        |
| Regional                   | 1.19 (1.04-1.35) |        |
| National                   | 1.26 (0.90-1.75) |        |
| Transplant era             |                  | <0.001 |
| 2005-2009                  | Reference        |        |
| 2010-2014                  | 0.79 (0.70-0.90) |        |
| 2015-2020                  | 0.73 (0.62-0.85) |        |

**Supplemental Table 8:** Multivariable Cox proportional hazards model evaluating center MP use as a predictor of kidney graft survival (N=5,930)

|                                        | Covariate-adjusted HR for graft survival (95% CI) | p-value      |
|----------------------------------------|---------------------------------------------------|--------------|
| <b>Center MP use, per 10% increase</b> | <b>1.00 (0.98-1.03)</b>                           | <b>0.851</b> |
| Recipient female sex                   | 0.93 (0.76-0.94)                                  | 0.172        |
| Recipient age, per year                | 1.01 (1.00-1.02)                                  | 0.001        |
| Recipient race/ethnicity               |                                                   | <0.001       |
| White                                  | Reference                                         |              |
| Black                                  | 1.19 (1.06-1.35)                                  |              |
| Hispanic                               | 0.83 (0.71-0.97)                                  |              |
| Asian                                  | 0.98 (0.74-1.29)                                  |              |
| Other                                  | 0.54 (0.33-0.88)                                  |              |
| Native MELD at LT, per point           | 1.00 (0.99-1.01)                                  | 0.444        |
| Kidney disease severity                |                                                   | 0.006        |
| On dialysis                            | Reference                                         |              |
| eGFR <30mL/min/1.73m <sup>2</sup> *    | 0.85 (0.76-0.94)                                  |              |
| eGFR ≥30mL/min/1.73m <sup>2</sup> *    | 0.82 (0.70-0.95)                                  |              |
| Ascites                                |                                                   | 0.230        |
| None                                   | Reference                                         |              |
| Mild                                   | 1.00 (0.87-1.15)                                  |              |
| Moderate-severe                        | 0.92 (0.80-1.05)                                  |              |
| Encephalopathy                         |                                                   | 0.132        |
| None                                   | Reference                                         |              |
| Grade 1-2                              | 1.04 (0.90-1.20)                                  |              |
| Grade 3-4                              | 1.20 (1.00-1.45)                                  |              |
| Recipient location                     |                                                   | 0.055        |
| Home                                   | Reference                                         |              |
| Inpatient                              | 1.08 (0.94-1.23)                                  |              |
| ICU                                    | 1.26 (1.04-1.52)                                  |              |
| Recipient diabetes                     | 1.24 (1.11-1.38)                                  | <0.001       |
| Recipient kidney disease               |                                                   | <0.001       |
| Glomerular disease                     | Reference                                         |              |
| Diabetes                               | 1.17 (0.97-1.41)                                  |              |
| Hypertension                           | 1.22 (0.95-1.58)                                  |              |
| Polycystic kidney disease              | 0.63 (0.48-0.85)                                  |              |
| Hepatorenal syndrome                   | 0.95 (0.75-1.20)                                  |              |
| Other                                  | 1.10 (0.92-1.33)                                  |              |
| Donor age, per year                    | 1.01 (1.01-1.02)                                  | <0.001       |
| Female donor sex                       | 1.03 (0.94-1.14)                                  | 0.513        |
| Donor race/ethnicity                   |                                                   | 0.064        |
| White                                  | Reference                                         |              |
| Black                                  | 1.20 (1.04-1.37)                                  |              |
| Hispanic                               | 1.07 (0.94-1.22)                                  |              |
| Asian/other                            | 1.10 (0.83-1.46)                                  |              |
| Donor hypertension                     | 1.16 (1.01-1.34)                                  | 0.036        |
| Donor diabetes                         | 1.05 (0.83-1.32)                                  | 0.700        |
| DCD donor                              | 1.50 (1.21-1.85)                                  | <0.001       |
| Kidney graft CIT, per hour             | 1.00 (1.00-1.01)                                  | 0.019        |

|                                       |                  |       |
|---------------------------------------|------------------|-------|
| Split liver                           | 1.16 (0.70-1.90) | 0.569 |
| Share type                            |                  | 0.004 |
| Local                                 | Reference        |       |
| Regional                              | 1.21 (1.05-1.38) |       |
| National                              | 1.41 (1.03-1.93) |       |
| Donor HCV Ab positive                 | 0.93 (0.74-1.17) | 0.516 |
| Donor terminal creatinine, per 1mg/dL | 1.03 (0.87-1.09) | 0.319 |
| Donor BMI, per kg/m <sup>2</sup>      | 1.00 (0.99-1.01) | 0.582 |
| Donor cause of death                  |                  | 0.265 |
| Anoxia                                | Reference        |       |
| CVA                                   | 1.01 (0.88-1.16) |       |
| Head trauma                           | 0.96 (0.83-1.10) |       |
| CNS tumor                             | 1.31 (0.69-2.49) |       |
| Other                                 | 0.76 (0.55-1.05) |       |
| Transplant era                        |                  | 0.009 |
| 2005-2009                             | Reference        |       |
| 2010-2014                             | 0.80 (0.69-0.93) |       |
| 2015-2020                             | 0.76 (0.62-0.94) |       |
